# Supplementary material for: Malectin Domain Protein Kinase (MDPK) Promotes Rice Resistance to Sheath Blight via IDD12, IDD13, and IDD14
Source: MDPI journal article supplement (doi:10.3390/ijms23158214), 2022-07-26
Supplement: s1 [file s1]

## Supplemental Table

**Table S1.** Primers used in this study

|             |                                   |
|-------------|-----------------------------------|
| pMDPK-F     | AAGCTTGTAGGCGAGAACAGCAGTCAG       |
| pMDPK-R     | GGATCCCCAAGATCCTCGCTTATTTAC       |
| MDPK-F      | AAGCTTATGCCCTGCAGTCCGCCATC        |
| MDPK-R      | GGTACCCCTCGCTGTTGGCATGGAGTT       |
| IDD12-F     | AAGCTTATGCTGAGTTCTTGCGCGCCGAC     |
| IDD12-R     | GGTACCGTTGAGGTCCATTGCCATCGTCCTAG  |
| IDD13-F     | AAGCTTATGTTGGGTTCTTGCGCCCCGA      |
| IDD13-R     | GGTACCCATGATGCCCATGCTGTTAGCGTGCTG |
| IDD14-F     | ATGGCACTGGTCAAGAGCCAC             |
| IDD14-R     | GATGCCGGCGCCGACGCCGCCG            |
| IDD12 RT-F  | GATCAGCTCCGACGTCGCCA              |
| IDD13 RT-F  | CGCCACTACCGGCGCCATG               |
| IDD14 RT-F  | GCGCGCCTGATCGCGCAGGTG             |
| MDPK RT-F   | TAGTGAAAGGCCAACGATGAG             |
| P1-F        | AGCAGTCAGTGGCGACAAAGGCATGCTGGTG   |
| P1-R        | CACCAGCATGCCTTTGTCGCCACTGACTGCT   |
| mP1-F       | AGCAGTCAGTGGAAAAAAGGCATGCTGGTG    |
| mP1-R       | CACCAGCATGCCTTTTTTTTCCACTGACTGCT  |
| Ubiquitin-F | CAAGATGATCTGCCGCAAATGC            |
| Ubiquitin-R | TTTAACCAGTCCATGAACCCG             |
